# Supplementary material for: Interpretable Prognostic Modeling for Long-Term Survival of Type A Aortic Dissection Patients Using Support Vector Machine Algorithm
Source: Research Square preprint supplement (doi:10.21203/rs.3.rs-5786813/v1), 2025-01-14
Supplement: Supplementary file 1 [file f2014f994ed76d49772f1667.docx]

**Table S1**. Preoperative Baseline Data of Patients Grouped Between the Survivors and Outcomes.

| Variables | All patients (%)  175cases | No. of outcomes (%)  54cases | No. of survivors (%)  121cases | P value |
| --- | --- | --- | --- | --- |
| **Demographical data** |  |  |  |  |
| Gender |  |  |  | 0.242 |
| Female | 36 (20.57%) | 14 (25.93%) | 22 (18.18%) |  |
| Male | 139 (79.43%) | 40 (74.07%) | 99 (81.82%) |  |
| Age( years) | 48.87 ± 9.57 | 50.48 ± 9.3 | 48.15 ± 9.65 | 0.051 |
| Risk factors |  |  |  |  |
| Smoking |  |  |  | 0.071 |
| No | 70 (40.00%) | 27 (50.00%) | 43 (35.54%) |  |
| Yes | 105 (60.00%) | 27 (50.00%) | 78 (64.46%) |  |
| BMI | 25.36 ± 3.82 | 25.48 ± 3.66 | 25.31 ± 3.9 | 0.778 |
| HTN |  |  |  | 0.487 |
| No | 55 (31.43%) | 15 (27.78%) | 40 (33.06%) |  |
| Yes | 120 (68.57%) | 39 (72.22%) | 81 (66.94%) |  |
| DM |  |  |  | 0.503 |
| No | 174 (99.43%) | 54 (100%) | 120 (99.17%) |  |
| Yes | 1 (0.57%) | 0 (0%) | 1 (0.83%) |  |
| Previous CAD history |  |  |  | 0.894 |
| No | 169 (96.57%) | 52 (96.30%) | 117 (96.69%) |  |
| Yes | 6 (3.43%) | 2 (3.70%) | 4 ( 3.31%) |  |
| **Condition at admission** |  |  |  |  |
| Phase |  |  |  | 0.069 |
| Acute | 160 (91.43%) | 53 (98.15%) | 107 (88.43%) |  |
| Subacute | 11 (6.29%) | 0 (0%) | 11 (9.09%) |  |
| Chronic | 4 (2.29) | 1 (1.85%) | 3 (2.48%) |  |
| SBP (mmHg) | 140.58 ± 31.39 | 138.2 ± 34.22 | 141.64 ± 30.13 | 0.451 |
| DBP (mmHg) | 80.55 ± 19.82 | 79.41 ± 22.67 | 81.07 ± 18.48 | 0.319 |
| Shock |  |  |  | <0.001 |
| No | 164 (93.71%) | 47 (87.04%) | 117 (96.69%) |  |
| Yes | 11 (6.29%) | 7 (12.96%) | 4 (3.31%) |  |
| MAP (mmHg) | 100.56 ± 22.06 | 99.01 ± 24.86 | 101.26 ± 20.76 | 0.453 |
| PP (mmHg) | 60.02 ± 21.61 | 58.8 ± 22.74 | 60.57 ± 21.16 | 0.442 |
| Heart rate (b.p.m.) | 83.63 ± 14.35 | 86.15 ± 14.52 | 82.51 ± 14.2 | 0.155 |
| Chest pain |  |  |  | < 0.001 |
| No | 28 (16.00%) | 11 (20.37%) | 17 (14.05%) |  |
| Yes | 147(84.00%) | 43 (79.63%) | 104 (85.95%) |  |
| Back pain |  |  |  | 0.062 |
| No | 74 (42.29%) | 23 (42.59%) | 51 (42.15%) |  |
| Yes | 101 (57.7%) | 31 (57.41%) | 70 (57.85%) |  |
| Abdominal pain |  |  |  | <0.001 |
| No | 158 (90.29%) | 44 (81.48%) | 114 (94.21%) |  |
| Yes | 17 (9.71%) | 10 (18.52%) | 7 (5.79%) |  |
| Altered consciousness |  |  |  | <0.001 |
| No | 168 (96.00%) | 51 (94.44%) | 117 (96.69%) |  |
| Yes | 7 (4.00%) | 3 (5.56%) | 4 (3.31%) |  |
| ST-segment deviation on ECG |  |  |  | <0.001 |
| No | 117 (66.86%) | 37 (68.52%) | 80 (66.12%) |  |
| Yes | 58 (33.14%) | 17 (31.48%) | 41 (33.88%) |  |
| Pericardial effusion |  |  |  | 0.444 |
| No | 101 (57.71%) | 22 (40.74%) | 79 (65.29%) |  |
| Yes | 74 (42.29%) | 32 (59.26%) | 42 (34.71%) |  |
| Pleural effusion |  |  |  | 0.326 |
| No | 91 (52.00%) | 32 (59.26%) | 59 (48.76%) |  |
| Yes | 84 (48.00%) | 22 (40.74%) | 62 (51.24%) |  |
| **Hospital stay** |  |  |  |  |
| POHS (days) | 19.37 ± 14.4 | 10.77 ± 10.29 | 23.13 ± 14.42 | <0.001 |
| ICUHS (days) | 11.93 ± 9.27 | 9.87 ± 9.89 | 12.85 ± 8.86 | 0.002 |
| **Preoperative laboratory results** |  |  |  |  |
| WBC (×10ˆ9/L) | 12.18 ± 4.39 | 13.74 ± 4.95 | 11.48 ± 3.94 | 0.002 |
| RBC (×10ˆ9/L) | 4.04 ± 1.17 | 3.90 ± 1.20 | 4.10 ± 1.16 | 0.402 |
| ANC (×10ˆ9/L) | 10.43 ± 4.38 | 12.01 ± 4.82 | 9.72 ± 4.0 | 0.001 |
| ALC(×10ˆ9/L) | 0.99 ± 0.52 | 0.93 ± 0.49 | 1.01 ± 0.53 | 0.302 |
| HB (g/L) | 129.37 ± 22.5 | 128.0 ± 22.84 | 129.98 ± 22.42 | 0.593 |
| PLT (×10ˆ9/L) | 168.53 ± 58.31 | 167.04 ± 55.99 | 169.19 ± 59.53 | 0.873 |
| Total Protein (g/L) | 65.19 ± 6.99 | 65.78 ± 6.54 | 64.93 ± 7.19 | 0.339 |
| ALB (g/L) | 33.94 ± 10.79 | 32.85 ± 10.94 | 34.42 ± 10.73 | 0.341 |
| ALT (IU/L) | 45.51 ± 123.23 | 73.98 ± 217.47 | 32.80 ± 24.62 | 0.372 |
| AST (IU/L) | 58.53 ± 169.46 | 103.63 ± 286.93 | 38.40 ± 62.85 | 0.293 |
| Creatinine (μmol/L) | 97.97 ± 57.34 | 121.91 ± 84.29 | 87.28 ± 35.44 | 0.003 |
| BUN (mmol/L), | 8.66 ± 15.74 | 9.38 ± 10.18 | 8.34 ± 17.7 | 0.002 |
| LDH (U/L) | 658.49 ± 965.54 | 898.37 ± 1611.92 | 551.44 ± 408.37 | 0.269 |
| D-dimer (μg/mL) | 10.08 ± 15.59 | 11.85 ± 17.28 | 9.29 ± 14.78 | 0.838 |
| Fibrinogen (g/L) | 3.02 ± 1.68 | 2.98 ± 1.84 | 3.03 ± 1.61 | 0.470 |
| FDP(mg/L) | 40.66 ± 86.86 | 45.47 ± 97.1 | 38.51 ± 82.23 | 0.967 |
| Myoglobin (μg/L) | 226.22 ± 468.6 | 169.56 ± 210.72 | 251.51 ± 544.7 | 0.916 |
| CK-MB (U/L) | 3.86 ± 6.94 | 3.48 ± 4.01 | 4.03 ± 7.91 | 0.391 |
| BNP (pg/mL) | 1014.67 ± 1821.98 | 1114.74 ± 2235.05 | 970.01 ± 1612.64 | 0.544 |
| cTnT (μg/L) | 0.21 ± 0.78 | 0.35 ± 1.15 | 0.15 ± 0.54 | 0.312 |
| SII | 2665.15 ± 3528.34 | 3534.46 ± 5430.65 | 2277.2 ± 2129.28 | 0.011 |
| **Intraoperative conditions** |  |  |  |  |
| Operation time (min) | 552.98 ± 136.17 | 616.19 ± 165.55 | 525.3 ± 111.68 | <0.001 |
| Intraoperative bleeding (ml) | 696.44 ± 760.34 | 1005.27 ± 1151.1 | 558.61 ± 437.01 | <0.001 |
| Transfusion of SRBC (U) | 3.70 ± 3.07 | 4.69 ± 3.45 | 3.26 ± 2.78 | 0.007 |
| Transfusion of Plasma (ml) | 826.41 ± 393.27 | 991.51 ± 435.41 | 752.73 ± 350.41 | <0.001 |
| CPB time (min) | 274.95 ± 68.7 | 299.06 ± 80.09 | 264.19 ± 60.26 | 0.002 |
| ACC time (min) | 161.57 ± 43.46 | 168.84 ± 31.85 | 158.33 ± 47.5 | 0.005 |

Abbreviations: POHS Postoperative Hospital Stay, ICUHS Intensive Care Unit Hospital Stay, SBP Systolic Blood Pressure, BMI Body Mass Index, HTN Hypertension, DM Diabetes Mellitus, b.p.m. beats per minute, MAP Mean Arterial Pressure, PP pulse pressure, ECG Electrocardiogram, CAD Coronary Artery Disease, WBC White Blood Cell, RBC Red Blood Cell, PLT Platelet, ANC Absolute Neutrophil Count, ALB Albumin, HB Hemoglobin, ALT Alanine Aminotransferase, AST Aspartate Aminotransferase, BUN Blood Urea Nitrogen, LDH Lactate Dehydrogenase, FDP Fibrin/Fibrinogen Degradation Products, CK-MB Creatine Kinase-Muscle/Brain, BNP B-Type Natriuretic Peptide, cTnT Cardiac Troponin T, SII Systemic Immune-Inflammation index, SRBC Suspended Red Blood Cells, CBP Cardiopulmonary Bypass time, ACC Aortic Cross Clamping time.

Notes: ‘outcome’ was defined as the presence of death under investigation.

**Table S2.** Preoperative Baseline Data of Patients Grouped Between the Training Set and Test Set.

| Variables | Test set  35cases | Training set  140cases | P value |
| --- | --- | --- | --- |
| **Demographical data** |  |  |  |
| Gender |  |  | 0.542 |
| Female | 10(28.57%) | 26(18.57%) |  |
| Male | 25(71.43%) | 114(81.43%) |  |
| Age( years) | 47.71 ± 10.20 | 49.16 ± 9.43 | 0.710 |
| **Risk factors** |  |  |  |
| Smoking |  |  | 0.702 |
| No | 15 (42.86%) | 55 (39.29%) |  |
| Yes | 20 (57.14%) | 85 (60.71%) |  |
| BMI | 25.54 ± 4.58 | 25.36 ± 3.59 | 0.997 |
| HTN |  |  | 0.224 |
| No | 14 (40.00%) | 41 (29.29%) |  |
| Yes | 21 (60.00%) | 99 (70.71%) |  |
| **Condition at admission** |  |  |  |
| Phase (Acute) |  |  | 0.053 |
| No | 0 | 15 (10.71%) |  |
| Yes | 35 (100%) | 125 (89.29%) |  |
| SBP (mmHg) | 150.94 ± 29.77 | 138.24 ± 31.41 | 0.058 |
| DBP (mmHg) | 84.94 ± 22.68 | 79.68 ± 19.13 | 0.272 |
| Shock |  |  | 0.353 |
| No | 34 (97.14%) | 130 (92.86%) |  |
| Yes | 1 (2.86%) | 10 (7.14%) |  |
| MAP (mmHg) | 106.94 ± 23.42 | 99.20 ± 21.62 | 0.119 |
| PP (mmHg) | 66.00 ± 20.15 | 58.56 ± 21.76 | 0.060 |
| Heart rate (b.p.m.) | 84.97 ± 12.11 | 83.35 ± 14.88 | 0.516 |
| Chest pain |  |  | 0.561 |
| No | 5 (14.29%) | 24 (17.14%) |  |
| Yes | 30 (85.71%) | 116 (82.86%) |  |
| Back pain |  |  | 0.312 |
| No | 15 (42.86%) | 58 (41.43%) |  |
| Yes | 20 (57.14%) | 82 (58.57%) |  |
| Abdominal pain |  |  | 0.142 |
| No | 34 (97.14%) | 125 (89.29%) |  |
| Yes | 1 (2.86%) | 15 (10.71%) |  |
| Altered consciousness |  |  | 0.179 |
| No | 35 (100%) | 133 (95.00%) |  |
| Yes | 0 (0%) | 7 (5.00%) |  |
| ST-segment deviation on ECG |  |  | 0.299 |
| No | 26 (74.29%) | 91 (65.00%) |  |
| Yes | 9 (25.71%) | 49 (35.00%) |  |
| Pericardial effusion |  |  | 0.109 |
| No | 16 (45.71%) | 85 (60.71%) |  |
| Yes | 19 (54.29%) | 55 (39.29%) |  |
| Pleural effusion |  |  | 0.652 |
| No | 17 (48.57%) | 74 (52.86%) |  |
| Yes | 18 (51.43%) | 66 (47.14%) |  |
| **Hospital stay** |  |  |  |
| POHS (days) | 16.74 ± 13.56 | 20.02 ± 14.58 | 0.174 |
| ICUHS (days) | 10.29 ± 9.71 | 12.34 ± 9.14 | 0.103 |
| **Preoperative laboratory results** |  |  |  |
| WBC (×10ˆ9/L) | 12.03 ± 3.85 | 12.23 ± 4.52 | 0.908 |
| RBC (×10ˆ9/L) | 4.40 ± 0.95 | 3.97 ± 1.19 | 0.112 |
| ANC (×10ˆ9/L) | 10.34 ± 3.89 | 10.46 ± 4.50 | 0.883 |
| ALC(×10ˆ9/L) | 0.90 ± 0.54 | 1.01 ± 0.52 | 0.151 |
| HB (g/L) | 132.17 ± 27.64 | 128.70 ± 21.05 | 0.357 |
| PLT (×10ˆ9/L) | 157.11 ± 47.48 | 171.77 ± 60.17 | 0.185 |
| Total Protein (g/L) | 66.74 ± 7.02 | 64.99 ± 7.02 | 0.222 |
| ALB (g/L) | 36.54 ± 10.08 | 33.54 ± 10.78 | 0.112 |
| ALT (IU/L) | 43.20 ± 76.77 | 46.11 ± 132.54 | 0.920 |
| AST (IU/L) | 57.09 ± 112.80 | 58.87 ± 181.20 | 0.459 |
| Creatinine (μmol/L) | 117.66 ± 95.36 | 93.37 ± 41.92 | 0.285 |
| BUN (mmol/L), | 7.84 ± 5.02 | 8.87 ± 17.43 | 0.400 |
| LDH (U/L) | 583.11 ± 365.91 | 677.54 ± 1064.15 | 0.317 |
| D-dimer (μg/mL) | 8.33 ± 13.32 | 10.50 ± 16.12 | 0.509 |
| Fibrinogen (g/L) | 2.81 ± 1.25 | 3.07 ± 1.77 | 0.753 |
| FDP(mg/L) | 28.41 ± 34.09 | 43.64 ± 95.49 | 0.576 |
| Myoglobin (μg/L) | 190.25 ± 315.92 | 233.50 ± 500.08 | 0.421 |
| CK-MB (U/L) | 4.10 ± 4.98 | 3.82 ± 7.36 | 0.162 |
| BNP (pg/mL) | 1234.13 ± 2902.51 | 958.80 ± 1442.57 | 0.225 |
| cTnT (μg/L) | 0.39 ± 1.19 | 0.17 ± 0.64 | 0.599 |
| SII | 2433.77 ± 1942.91 | 2732.15 ± 3823.14 | 0.656 |
| **Intraoperative conditions** |  |  |  |
| Operation time (min) | 558.31 ± 121.24 | 551.38 ± 140.14 | 0.342 |
| Intraoperative bleeding (ml) | 725.33 ± 830.29 | 679.21 ± 736.47 | 0.747 |
| Transfusion of SRBC (U) | 4.24 ± 2.83 | 3.54 ± 3.11 | 0.222 |
| Transfusion of Plasma | 888.71 ± 351.02 | 804.44 ± 393.99 | 0.270 |
| CPB time (min) | 274.63 ± 56.91 | 275.78 ± 72.76 | 0.677 |
| ACC time (min) | 157.14 ± 29.47 | 162.73 ± 46.32 | 0.981 |

Abbreviations: POHS Postoperative Hospital Stay, ICUHS Intensive Care Unit Hospital Stay, SBP Systolic Blood Pressure, BMI Body Mass Index, HTN Hypertension, b.p.m. beats per minute, MAP Mean Arterial Pressure, PP pulse pressure, ECG Electrocardiogram, CAD Coronary Artery Disease, WBC White Blood Cell, RBC Red Blood Cell, PLT Platelet, ANC Absolute Neutrophil Count, ALB Albumin, HB Hemoglobin, ALT Alanine Aminotransferase, AST Aspartate Aminotransferase, BUN Blood Urea Nitrogen, LDH Lactate Dehydrogenase, FDP Fibrin/Fibrinogen Degradation Products, CK-MB Creatine Kinase-Muscle/Brain, BNP B-Type Natriuretic Peptide, cTnT Cardiac Troponin T, SRBC Suspended Red Blood Cells, CBP Cardiopulmonary Bypass time, ACC Aortic Cross Clamping time.

**Figure S1**. Bubble Plot of Point-Biserial Correlation Coefficients Between Abdominal Pain and Continuous Variables.


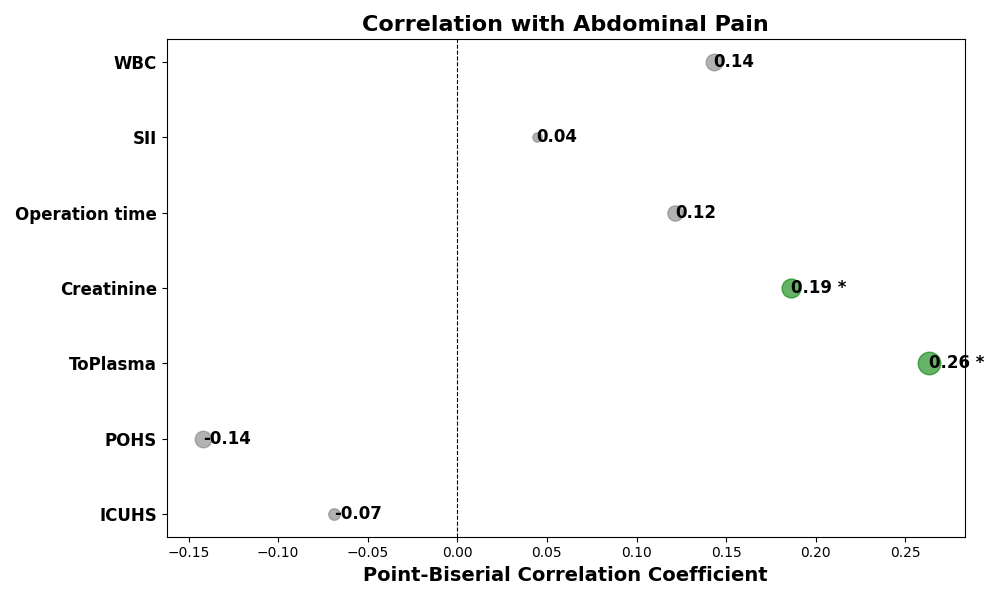


Abbreviations: POHS Postoperative Hospital Stay, ICUHS Intensive Care Unit Hospital Stay, WBC White Blood Cell count.

Note: ‘*’ denotes p<0.05.

**Figure S2.** Comparison of SVM Model Performance Metrics (Training vs Test set)


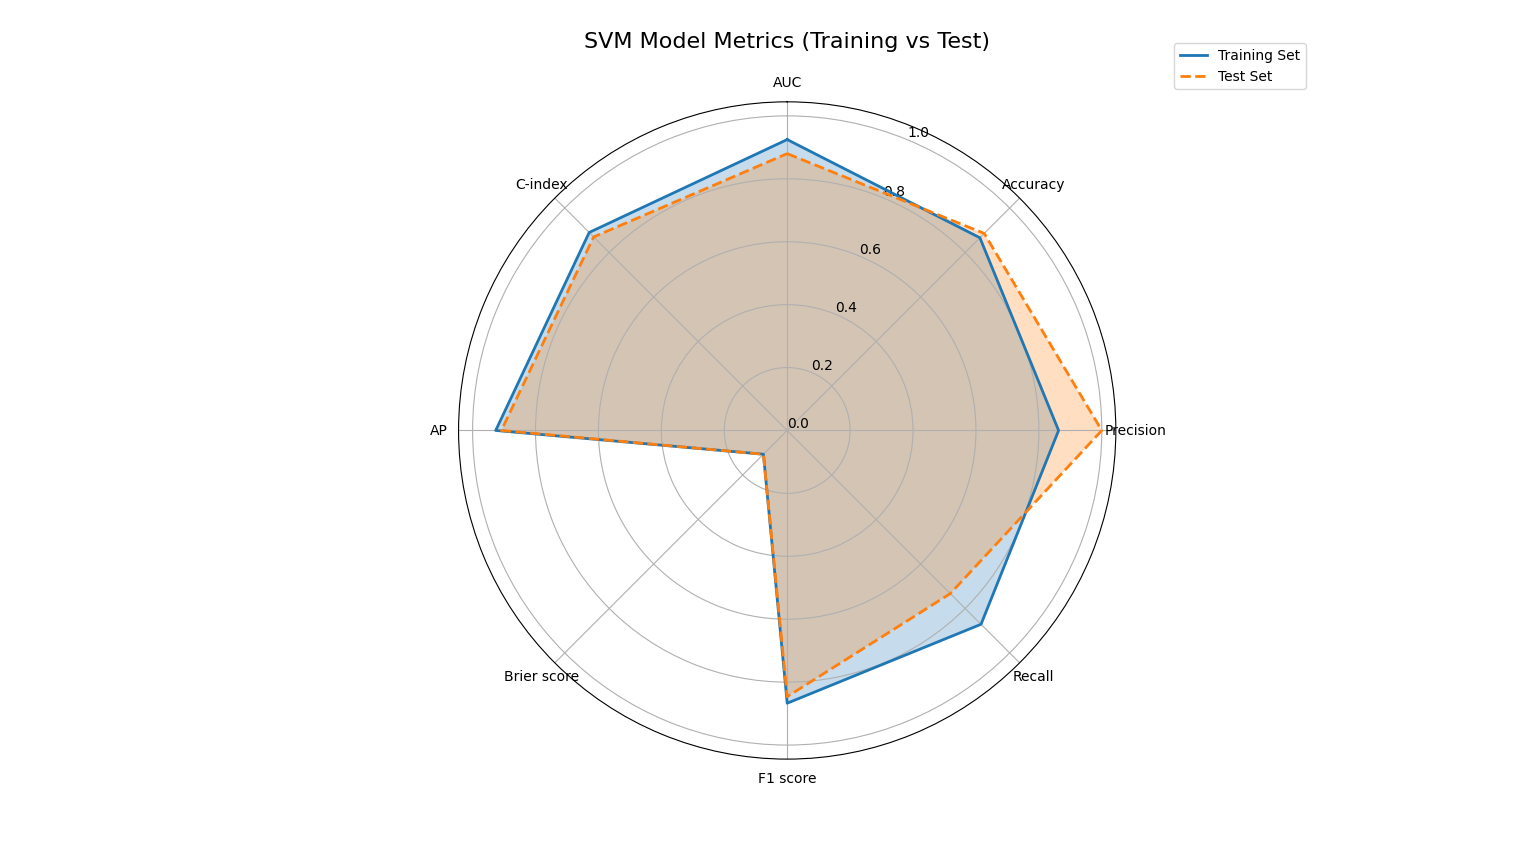


Abbreviations: AUC Area Under the Curve, AP Average Precision, C-Index Concordance Index.
